# Supplementary material for: Versatile Flexible Graphene Multielectrode Arrays
Source: PubMed Central journal article supplement (PMC5371774; doi:10.3390/bios7010001), 2016-12-23
Supplement: biosensors-07-00001-s001.pdf [file biosensors-07-00001-s001.pdf]

# Supplementary Materials: Versatile Flexible Graphene Multielectrode Arrays

Dmitry Kireev, Silke Seyock, Mathis Ernst, Vanessa Maybeck, Bernhard Wolfrum and Andreas Offenhäusser

**Table S1.** Comparison of the signal-to-noise ratio (SNR) of the extracellular recording with different kinds of microelectrode arrays (MEAs).

|                       | Active Material           | Substrate            | Electrode Diameter                   | Tissue Type               | SNR                                                      |
|-----------------------|---------------------------|----------------------|--------------------------------------|---------------------------|----------------------------------------------------------|
| This work             | Graphene                  | Polyimide            | 20 $\mu\text{m}$                     | Heart tissue<br>HL-1      | $65 \pm 15$ <sup>(a)</sup><br>$20 \pm 10$ <sup>(a)</sup> |
| Du et al. [1]         | Graphene                  | Polyimide            | 20 $\mu\text{m}$                     | Neurons                   | $10.3 \pm 1.2$                                           |
| Brüggemann et al. [2] | Au planar                 | SiO <sub>2</sub> /Si | 10 $\mu\text{m}$<br>20 $\mu\text{m}$ | HL-1                      | 57 <sup>(b)</sup><br>141 <sup>(b)</sup>                  |
| Hofmann et al. [3]    | Au nanocavity             | SiO <sub>2</sub> /Si | 10 $\mu\text{m}$                     | HL-1                      | $158 \pm 8$                                              |
| Nick et al. [4]       | Au<br>Rough TiN           | Quartz               | 30 $\mu\text{m}$                     | Chicken<br>cardiomyocytes | 10 <sup>(c)</sup><br>207 <sup>(c)</sup>                  |
| James et al. [5]      | Au planar<br>Pt nonplanar | Fused<br>silica      | 12 $\mu\text{m}$                     | Neurons                   | $15 \pm 10$                                              |

(a) Noise defined as  $2 \times \text{MAD}$  (mean absolute deviation); (b) Noise defined as root mean square (RMS); (c) SNR defined as variance ( $(V_{\text{peak}}/\sigma_{\text{noise}})^2$ ).

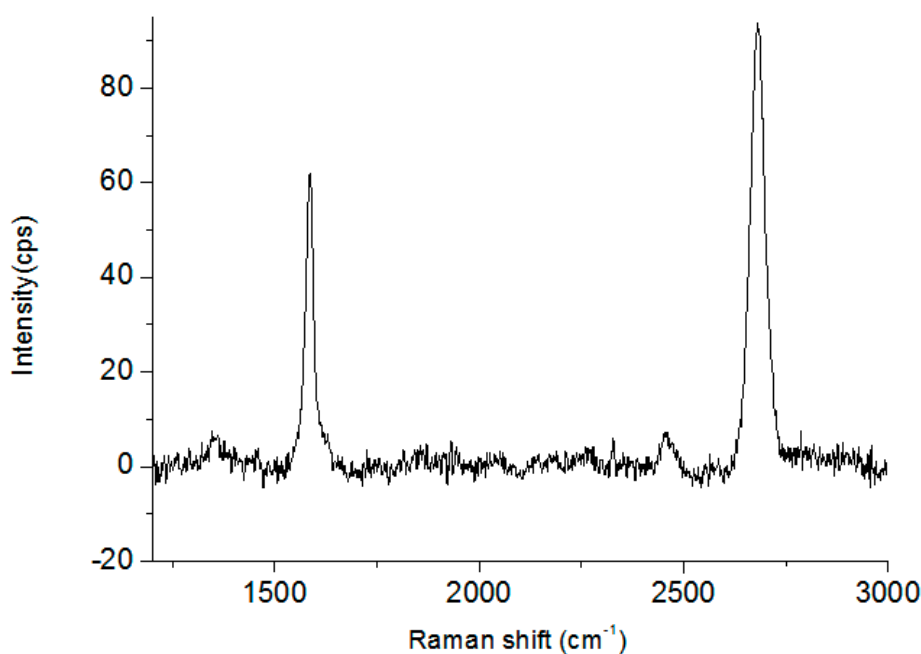

**Figure S1.** Raman spectra of the chemical vapor deposition (CVD)-grown graphene used. Almost-absent D peak shows that the graphene is without defects.

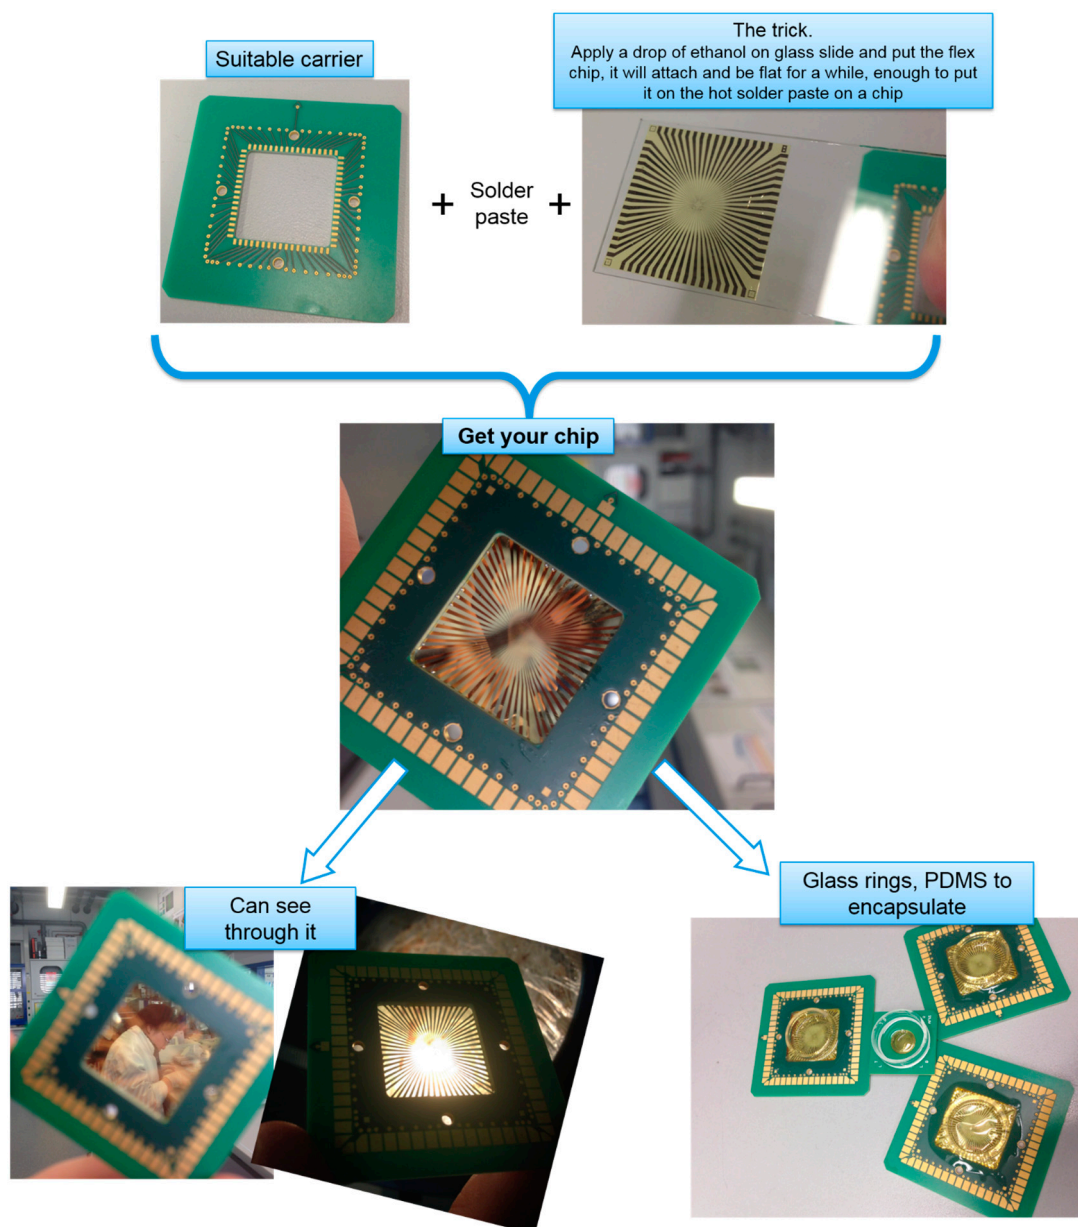

Figure S2. Soldering flexible chip: overview.

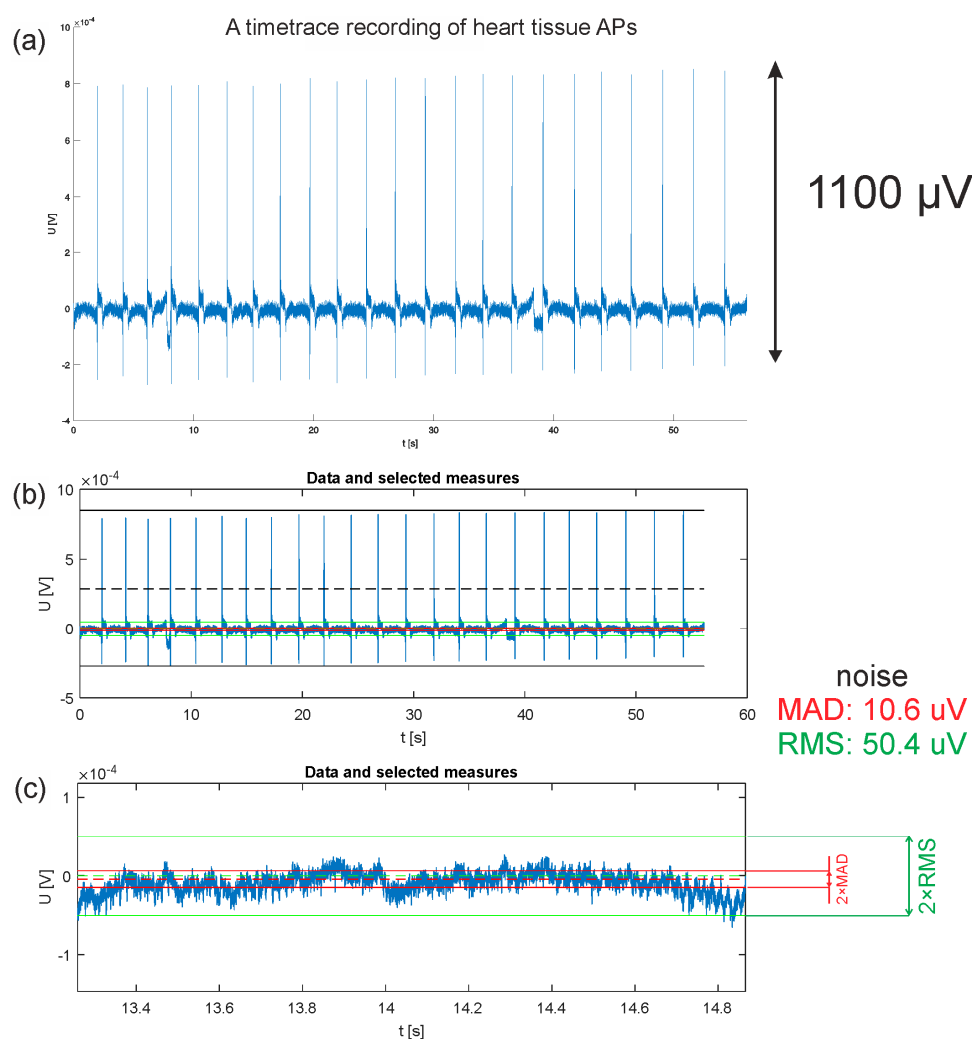

**Figure S3.** MAD vs RMS noise value comparison. For a long recording, the noise is usually evaluated for the whole time (a,b). In this case, the RMS value will be overestimated, while the  $2 \times \text{MAD}$  value better approximates the peak-to-peak noise in the interspike interval, as can be seen in (c).

## References

1. Du, X.; Wu, L.; Cheng, J.; Huang, S.; Cai, Q.; Jin, Q.; Zhao, J. Graphene microelectrode arrays for neural activity detection. *J. Biol. Phys.* **2015**, *41*, 339–347.
2. Brüggemann, D.; Wolfrum, B.; Maybeck, V.; Mourzina, Y.; Jansen, M.; Offenhäusser, A. Nanostructured gold microelectrodes for extracellular recording from electrogenic cells. *Nanotechnology* **2011**, *22*, 265104.
3. Hofmann, B.; Kätelhön, E.; Schottdorf, M.; Offenhäusser, A.; Wolfrum, B. Nanocavity electrode array for recording from electrogenic cells. *Lab Chip* **2011**, *11*, 1054–1058.
4. Nick, C.; Joshi, R.; Schneider, J.J.; Thielemann, C. Three-dimensional carbon nanotube electrodes for extracellular recording of cardiac myocytes *Biointerphases* **2012**, *7*, 1–6.
5. James, C.D.; Spence, A.J.H.; Dowell-Mesfin, N.M.; Hussain, R.J.; Smith, K.L.; Craighead, H.G.; Isaacson, M.S.; Shain, W. Turner, J.N. Extracellular recordings from patterned neuronal networks using planar microelectrode arrays *IEEE Trans. Biomed. Eng.* **2004**, *51*, 1640–1648.
